# Supplementary material for: Safety of expedited-surgery protocols in anticoagulant-treated patients with hip fracture: a systematic review and meta-analysis
Source: PubMed Central journal article supplement — Can J Surg. 2023 Mar 31;66(2):E170–80. doi: 10.1503/cjs.010021 (PMC10069416; doi:10.1503/cjs.010021), 2023-03-31
Supplement: CJS-010021-at-1.pdf [file CJS-010021-at-1.pdf]

## **Appendix 1. Supplemental material**

### Search Strategy

1. Hip Fractures/
2. hip fracture\*.mp. or intertrochanter\* fracture\*.mp. or femoral
3. neck fracture\*.mp. or subtrochanter\* fracture\*.mp. or Bone
4. Nails/ or Arthroplasty, Replacement, Hip/ or Fracture Fixation/ or
5. Hemiarthroplasty/
6. exp Fracture Fixation, Intramedullary/ or exp Fracture Fixation,
7. Internal/
8. 1 or 2 or 3
9. exp Anticoagulants/
10. warfarin.mp. or warfarin.mp. or apixaban.mp. or rivaroxaban.
11. mp. or dabigatran.mp. or fondaparinux.mp. or edoxaban.mp or
12. Heparin/ or exp Aspirin/ or vitamin K antagonist.mp. or enoxaparin.
13. mp. or dalteparin.mp. or tinzaparin.mp. or nadroparin.mp.
14. 5 or 6
15. exp Venous Thromboembolism/ or exp Thromboembolism/ or
16. exp Embolism/ or exp Pulmonary Embolism/ or DVT.mp. or exp
17. Thrombosis/ or exp Venous Thrombosis/
18. exp Blood Loss, Surgical/ or exp Postoperative Hemorrhage/ or
19. exp Erythrocyte Transfusion/ or exp Blood Transfusion/ or exp
20. Blood Coagulation/
21. exp Patient Admission/ or exp Mortality/ or exp Survival Rate/
22. or exp Intraoperative Period/ or exp Time-to-Treatment/ or exp
23. Time Factors/
24. exp Patient Safety/ or exp Perioperative Care/ or exp
25. Cardiovascular Diseases/ or exp Risk Assessment/ or exp
26. Treatment Outcome/
27. 9 or 10 or 11
28. 4 and 7 and 12

DOI: 10.1503/cjs.010021

Online appendices are unedited and posted as supplied by the authors.

**Supplemental Table S1.** Quality assessment based on the Newcastle-Ottawa Scale of studies included in the systematic review.

| Study            | Selection                            |                                 |                           | Outcome not present at start of study | Comparability*           |                       | Outcome             |                       | Total |
|------------------|--------------------------------------|---------------------------------|---------------------------|---------------------------------------|--------------------------|-----------------------|---------------------|-----------------------|-------|
|                  | Representativeness of exposed cohort | Selection of non-exposed cohort | Ascertainment of exposure |                                       | Comparability of cohorts | Assessment of outcome | Length of follow-up | Adequacy of follow-up |       |
| Buecking et al.  | *                                    | *                               | *                         | *                                     |                          | *                     | *                   | *                     | 7     |
| Moore et al.     | *                                    | *                               | *                         | *                                     | *                        | *                     | *                   | *                     | 8     |
| Tal et al.       | *                                    | *                               | *                         | *                                     |                          | *                     | *                   | *                     | 7     |
| Shuetze et al.   |                                      | *                               | *                         | *                                     |                          | *                     | *                   | *                     | 7     |
| Mattisson et al. | *                                    | *                               | *                         | *                                     | *                        | *                     | *                   | *                     | 8     |
| Ng et al.        | *                                    |                                 | *                         | *                                     |                          | *                     | *                   | *                     | 6     |
| Diament et al.   | *                                    | *                               | *                         | *                                     |                          | *                     | *                   | *                     | 7     |
| Ahmed et al.     | *                                    | *                               | *                         | *                                     |                          | *                     | *                   | *                     | 6     |
| Ashouri et al.   | *                                    | *                               | *                         | *                                     |                          |                       | *                   | *                     | 6     |
| Vitale et al.    | *                                    | *                               | *                         | *                                     | *                        | *                     | *                   | *                     | 8     |
| Bhatia et al.    | *                                    | *                               |                           | *                                     |                          | *                     | *                   | *                     | 6     |
| Schermann et al. | *                                    | *                               | *                         | *                                     |                          | *                     | *                   | *                     | 7     |
| Franklin et al   | *                                    |                                 |                           | *                                     | *                        | *                     | *                   | *                     | 6     |
| Mullins et al    | *                                    | *                               | *                         | *                                     | *                        | *                     | *                   | *                     | 8     |

\*Two stars can be awarded to comparability of cohorts on the basis of design or analysis. All other categories can be awarded one star.
